# Supplementary material for: The Serological Prevalence of Rabies Virus-Neutralizing Antibodies in the Bat Population on the Caribbean Island of Trinidad
Source: MDPI journal article supplement (doi:10.3390/v12020178), 2020-02-05
Supplement: s1 [file s1]

**Table S1:** Geographic locations and sampled years for bat serological sample set utilized in the study

| Location of capture | District of Capture   | N tested | N positive | Species of bats (n= number of bats)           | Sampled years    |
|---------------------|-----------------------|----------|------------|-----------------------------------------------|------------------|
| Arena               | Caroni                | 5        | 0          | <i>Carollia perspicillata</i> (3)             | 2016, 2017       |
|                     |                       |          |            | <i>Artibeus jamaicensis planirostris</i> (1)  | 2017             |
|                     |                       |          |            | <i>Uroderma bilobatum</i> (1)                 | 2012             |
| Arima Valley        | St. Andrew/ St. David | 3        | 0          | <i>Uroderma bilobatum</i> (1)                 | 2016             |
|                     |                       |          |            | <i>Artibeus jamaicensis planirostris</i> (2)  | 2016             |
| Aripo               | St. Andrew/ St. David | 10       | 0          | <i>Carollia perspicillata</i> (6)             | 2016, 2017       |
|                     |                       |          |            | <i>Artibeus jamaicensis planirostris</i> (2)  | 2016, 2017       |
|                     |                       |          |            | <i>Pteronotus parnellii</i> (2)               | 2016, 2017       |
| Avocat              | St. Patrick           | 13       | 3          | <i>Desmodus rotundus</i> (13)                 | 2012             |
| Buenos Ayres        | St. Patrick           | 5        | 1          | <i>Desmodus rotundus</i> (5)                  | 2012             |
| Cedros              | St. Patrick           | 30       | 1          | <i>Desmodus rotundus</i> (1)                  | 2015             |
|                     |                       |          |            | <i>Carollia perspicillata</i> (29)            | 2017             |
| Chagaramas          | St. George West       | 2        | 0          | <i>Desmodus rotundus</i> (2)                  | 2017             |
| Champs Fleurs       | St. George East       | 38       | 13         | <i>Artibeus jamaicensis planirostris</i> (32) | 2012, 2017       |
|                     |                       |          |            | <i>Phyllostomus discolor</i> (4)              | 2017             |
|                     |                       |          |            | <i>Sturnira tildae</i> (1)                    | 2017             |
|                     |                       |          |            | <i>Carollia perspicillata</i> (1)             | 2013             |
| Fishing pond        | St. Andrew/ St. David | 16       | 0          | <i>Glossophaga soricina</i> (13)              | 2017             |
|                     |                       |          |            | <i>Glossophaga longirostris</i> (3)           | 2017             |
| Forest Reserve      | St. Patrick           | 3        |            | <i>Desmodus rotundus</i> (3)                  | 2016             |
| Fyzabad             | St. Patrick           | 16       |            | <i>Desmodus rotundus</i> (16)                 | 2012, 2016, 2017 |
| Guayaguayarare      | Nariva/ Mayaro        | 6        |            | <i>Desmodus rotundus</i> (6)                  | 2013             |
| Guico Tamana        | St. Andrew/ St. David | 4        | 0          | <i>Glossophaga soricina</i> (2)               | 2016, 2017       |
|                     |                       |          |            | <i>Artibeus jamaicensis planirostris</i> (1)  | 2017             |
|                     |                       |          |            | <i>Carollia perspicillata</i> (1)             | 2017             |

| Location of capture | District of Capture | N tested | N positive | Species of bats (n= number of bats)          | Sampled years |
|---------------------|---------------------|----------|------------|----------------------------------------------|---------------|
| Lopinot             | St. George East     | 25       | 5          | <i>Artibeus jamaicensis planirostris</i> (4) | 2012          |
|                     |                     |          |            | <i>Artibeus lituratus</i> (15)               | 2012          |
|                     |                     |          |            | <i>Glossophaga soricina</i> (2)              | 2012          |
|                     |                     |          |            | <i>Saccopteryx bilineata</i> (1)             | 2012          |
|                     |                     |          |            | <i>Sturnira lilium</i> (3)                   | 2012          |
| Los Iros            | St. Patrick         | 5        | 0          | <i>Desmodus rotundus</i> (2)                 | 2016          |
|                     |                     |          |            | <i>Artibeus jamaicensis planirostris</i> (3) | 2016          |
| Manuel Congo        | Caroni              | 6        | 0          | <i>Sturnira lilium</i> (1)                   | 2017          |
|                     |                     |          |            | <i>Platyrrhinus fusciventris</i> (1)         | 2017          |
|                     |                     |          |            | <i>Carollia perspicillata</i> (1)            | 2017          |
|                     |                     |          |            | <i>Glossophaga soricina</i> (1)              | 2017          |
|                     |                     |          |            | <i>Artibeus jamaicensis planirostris</i> (2) | 2017          |
| Maracas Valley      | St. George East     | 14       | 1          | <i>Carollia perspicillata</i> (2)            | 2012          |
|                     |                     |          |            | <i>Artibeus jamaicensis planirostris</i> (1) | 2012          |
|                     |                     |          |            | <i>Artibeus lituratus</i> (2)                | 2012          |
|                     |                     |          |            | <i>Molossus molossus</i> (9)                 | 2016          |
| Monos Island        | St. George West     | 4        | 0          | <i>Diaemus youngi</i> (1)                    | 2017          |
|                     |                     |          |            | <i>Noctilio leporinus</i> (3)                | 2017          |
| Moruga              | Victoria            | 10       | 0          | <i>Desmodus rotundus</i> (3)                 | 2016          |
|                     |                     |          |            | <i>Lonchorhina aurita</i> (1)                | 2016          |
|                     |                     |          |            | <i>Uroderma bilobatum</i> (2)                | 2016          |
|                     |                     |          |            | <i>Artibeus jamaicensis planirostris</i> (4) | 2016          |
| Palo Seco           | St. Patrick         | 6        | 0          | <i>Desmodus rotundus</i> (6)                 | 2016          |
| Penal               | St. Patrick         | 9        | 1          | <i>Desmodus rotundus</i> (9)                 | 2016          |
| Port of Spain       | St. George West     | 5        | 0          | <i>Artibeus jamaicensis planirostris</i> (3) | 2016          |
|                     |                     |          |            | <i>Artibeus lituratus</i> (2)                | 2016          |
| Rio Claro           | Nariva/ Mayaro      | 2        | 0          | <i>Molossus rufus</i> (2)                    | 2016          |

| Location of capture | District of Capture   | N tested   | N positive | Species of bats (n= number of bats)           | Sampled years    |
|---------------------|-----------------------|------------|------------|-----------------------------------------------|------------------|
| Santa Cruz          | St. George West       | 49         | 2          | <i>Artibeus lituratus</i> (13)                | 2012             |
|                     |                       |            |            | <i>Saccopteryx bilineata</i> (3)              | 2012             |
|                     |                       |            |            | <i>Artibeus jamaicensis planirostris</i> (4)  | 2012             |
|                     |                       |            |            | <i>Carollia perspicillata</i> (16)            | 2012, 2016, 2017 |
|                     |                       |            |            | <i>Sturnira tildae</i> (1)                    | 2016             |
|                     |                       |            |            | <i>Glossophaga soricina</i> (1)               | 2016             |
|                     |                       |            |            | <i>Desmodus rotundus</i> (7)                  | 2013, 2016       |
|                     |                       |            |            | <i>Uroderma bilobatum</i> (3)                 | 2016             |
|                     |                       |            |            | <i>Pteronotus parnellii</i> (1)               | 2016             |
| St. Augustine       | St. George East       | 13         | 2          | <i>Molossus molossus</i> (2)                  | 2016             |
|                     |                       |            |            | <i>Glossophaga soricina</i> (6)               | 2017             |
|                     |                       |            |            | <i>Artibeus jamaicensis planirostris</i> (5)  | 2016, 2017       |
| St. James           | St. George West       | 19         | 0          | <i>Artibeus jamaicensis planirostris</i> (19) | 2012, 2016       |
| Tabaquite           | Caroni                | 6          | 1          | <i>Anoura geoffroyi</i> (2)                   | 2016             |
|                     |                       |            |            | <i>Phyllostomus hastatus</i> (3)              | 2016             |
|                     |                       |            |            | <i>Carollia perspicillata</i> (1)             | 2016             |
| Tableland           | Victoria              | 17         | 1          | <i>Desmodus rotundus</i> (17)                 | 2016             |
| Toco                | St. Andrew/ St. David | 6          | 1          | <i>Artibeus jamaicensis planirostris</i> (6)  | 2016, 2017       |
| Wallerfield         | St. George East       | 28         | 1          | <i>Desmodus rotundus</i> (17)                 | 2012, 2016       |
|                     |                       |            |            | <i>Pteronotus parnellii</i> (5)               | 2016             |
|                     |                       |            |            | <i>Mormoops megalophylla</i> (3)              | 2016             |
|                     |                       |            |            | <i>Glossophaga soricina</i> (1)               | 2016             |
|                     |                       |            |            | <i>Carollia perspicillata</i> (2)             | 2016             |
| Williamsville       | Victoria              | 8          | 0          | <i>Carollia perspicillata</i> (8)             | 2016             |
| <b>Total</b>        |                       | <b>383</b> | <b>33</b>  |                                               |                  |

**Table S2:** Demographic and habitat information for RVNA positive bat samples

| Location-District | No. bats tested (RVNA positive) | Bat ID | Year | Season | Location-County | Urbanization Level | Method of capture | RVNA positive bat species                | Feeding behavior | Sex | Age | RVNA titer level (IU/ml) |
|-------------------|---------------------------------|--------|------|--------|-----------------|--------------------|-------------------|------------------------------------------|------------------|-----|-----|--------------------------|
| Avocat            | 13 (3)                          | T135   | 2012 | WS     | St. Patrick     | Ru                 | Field             | <i>Desmodus rotundus</i>                 | Sanguivore       | F   | A   | 0.3                      |
|                   |                                 | T136   | 2012 | WS     | St. Patrick     | Ru                 | Field             | <i>Desmodus rotundus</i>                 | Sanguivore       | M   | A   | 19                       |
|                   |                                 | T143   | 2012 | WS     | St. Patrick     | Ru                 | Field             | <i>Desmodus rotundus</i>                 | Sanguivore       | M   | A   | 15.6                     |
| Buenos Ayres      | 5 (1)                           | T166   | 2012 | WS     | St. Patrick     | Ru                 | Field             | <i>Desmodus rotundus</i>                 | Sanguivore       | M   | A   | 0.2                      |
| Cedros            | 30 (1)                          | T370   | 2017 | DS     | St. Patrick     | Ru                 | Roost             | <i>Carollia perspicillata</i>            | Frugivore        | F   | A   | 0.31                     |
| Champs Fleurs     | 38 (13)                         | T3     | 2012 | DS     | St. George East | NRu-nr             | Roost             | <i>Artibeus jamaicensis planirostris</i> | Frugivore        | F   | A   | 0.13                     |
|                   |                                 | T5     | 2012 | DS     | St. George East | NRu-nr             | Roost             | <i>Artibeus jamaicensis planirostris</i> | Frugivore        | F   | A   | 0.11                     |
|                   |                                 | T8     | 2012 | DS     | St. George East | NRu-nr             | Roost             | <i>Artibeus jamaicensis planirostris</i> | Frugivore        | F   | A   | 0.13                     |
|                   |                                 | T9     | 2012 | DS     | St. George East | NRu-nr             | Roost             | <i>Artibeus jamaicensis planirostris</i> | Frugivore        | F   | A   | 3.1                      |
|                   |                                 | T14    | 2012 | DS     | St. George East | NRu-nr             | Roost             | <i>Artibeus jamaicensis planirostris</i> | Frugivore        | F   | A   | 0.13                     |
|                   |                                 | T15    | 2012 | DS     | St. George East | NRu-nr             | Roost             | <i>Artibeus jamaicensis planirostris</i> | Frugivore        | M   | J   | 0.13                     |
|                   |                                 | T17    | 2012 | DS     | St. George East | NRu-nr             | Roost             | <i>Artibeus jamaicensis planirostris</i> | Frugivore        | M   | A   | 0.13                     |
|                   |                                 | T18    | 2012 | DS     | St. George East | NRu-nr             | Roost             | <i>Artibeus jamaicensis planirostris</i> | Frugivore        | F   | A   | 0.62                     |
|                   |                                 | T19    | 2012 | DS     | St. George East | NRu-nr             | Roost             | <i>Artibeus jamaicensis planirostris</i> | Frugivore        | M   | J   | 0.84                     |
|                   |                                 | T22    | 2012 | DS     | St. George East | NRu-nr             | Roost             | <i>Artibeus jamaicensis planirostris</i> | Frugivore        | M   | J   | 0.31                     |
|                   |                                 | T23    | 2012 | DS     | St. George East | NRu-nr             | Roost             | <i>Artibeus jamaicensis planirostris</i> | Frugivore        | F   | J   | 2.0                      |
|                   |                                 | T25    | 2012 | DS     | St. George East | NRu-nr             | Roost             | <i>Artibeus jamaicensis planirostris</i> | Frugivore        | F   | J   | 3.4                      |
|                   |                                 | T345   | 2017 | DS     | St. George East | Ru                 | Field             | <i>Artibeus jamaicensis planirostris</i> | Frugivore        | F   | A   | 0.12                     |
| Lopinot           | 25 (5)                          | T32    | 2012 | DS     | St. George East | Ru                 | Roost             | <i>Artibeus lituratus</i>                | Frugivore        | M   | J   | 0.13                     |
|                   |                                 | T34    | 2012 | DS     | St. George East | Ru                 | Roost             | <i>Artibeus lituratus</i>                | Frugivore        | F   | A   | 0.13                     |
|                   |                                 | T36    | 2012 | DS     | St. George East | Ru                 | Roost             | <i>Artibeus lituratus</i>                | Frugivore        | F   | J   | 0.13                     |
|                   |                                 | T39    | 2012 | DS     | St. George East | Ru                 | Roost             | <i>Artibeus lituratus</i>                | Frugivore        | F   | J   | 0.6                      |
|                   |                                 | T42    | 2012 | DS     | St. George East | Ru                 | Roost             | <i>Glossophaga soricina</i>              | Nectarivore      | F   | A   | 0.12                     |
| Maracas Valley    | 14 (1)                          | T81    | 2012 | DS     | St. George East | Ru                 | Field             | <i>Artibeus lituratus</i>                | Frugivore        | M   | A   | 4.2                      |
| Penal             | 9 (1)                           | T188   | 2012 | WS     | St. Patrick     | Ru                 | Field             | <i>Desmodus rotundus</i>                 | Sanguivore       | M   | A   | 1.2                      |
| Santa Cruz        | 49 (2)                          | T171   | 2012 | DS     | St. George West | NRu-r              | Roost             | <i>Artibeus lituratus</i>                | Frugivore        | M   | A   | 0.17                     |
|                   |                                 | T107   | 2012 | WS     | St. George West | Ru                 | Field             | <i>Carollia perspicillata</i>            | Frugivore        | M   | A   | 0.7                      |

| Location-District | No. bats tested (RVNA positive) | Bat ID | Year | Season | Location-County       | Urbanization Level | Method of capture | RVNA positive bat species                | Feeding behavior | Sex | Age | RVNA titer level (IU/ml) |
|-------------------|---------------------------------|--------|------|--------|-----------------------|--------------------|-------------------|------------------------------------------|------------------|-----|-----|--------------------------|
| St. Augustine     | 13 (2)                          | T337   | 2017 | DS     | St. George East       | NRu-nr             | Field             | <i>Artibeus jamaicensis planirostris</i> | Frugivore        | M   | A   | 0.2                      |
|                   |                                 | JC347  | 2017 | DS     | St. George East       | NRu-nr             | Field             | <i>Artibeus jamaicensis planirostris</i> | Frugivore        | F   | A   | 0.15                     |
| Tabaquite         | 6 (1)                           | T293   | 2016 | DS     | Caroni                | Ru                 | Roost             | <i>Phyllostomus hastatus</i>             | Mixed            | M   | A   | 0.1                      |
| Tableland         | 17 (1)                          | T150   | 2012 | WS     | Victoria              | Ru                 | Field             | <i>Desmodus rotundus</i>                 | Sanguivore       | F   | A   | 0.2                      |
| Toco              | 6 (1)                           | JC225  | 2016 | DS     | St. Andrew/ St. David | Ru                 | Roost             | <i>Artibeus jamaicensis planirostris</i> | Frugivore        | F   | A   | 0.1                      |
| Wallerfield       | 28 (1)                          | T182   | 2012 | WS     | St. George East       | Ru                 | Field             | <i>Carollia perspicillata</i>            | Frugivore        | F   | A   | 0.1                      |

DS: Dry season

WS: Wet season

Ru: rural

NRu-nr: non-rural, non-residential

NRu-r: non-rural, residential
